# Supplementary material for: Facile synthesis of silver/silver thiocyanate (Ag@AgSCN) plasmonic nanostructures with enhanced photocatalytic performance
Source: publisher site journal article supplement (doi:10.3762/bjnano.8.277), 2017-12-22
Supplement: Additional file 1 [file 2190-4286-8-277-S1.pdf]

# Supporting Information

for

## **Facile synthesis of silver/silver thiocyanate (Ag@AgSCN) plasmonic nanostructures with enhanced photocatalytic performance**

Xinfu Zhao<sup>1</sup>, Dairong Chen<sup>1,2</sup>, Abdul Qayum<sup>1</sup>, Bo Chen<sup>\*2</sup> and Xiuling Jiao<sup>\*1,2</sup>

Address: <sup>1</sup>School of Chemistry and Chemical Engineering, Shandong University, Jinan 250100, PR China  
and <sup>2</sup>National Engineering Research Center for Colloidal Materials, Shandong University, Jinan 250100,  
PR China

Email: Bo Chen - sduchenbo@126.com, Xiuling Jiao - jiaoxl@sdu.edu.cn

\* Corresponding author

## **Additional experimental data**

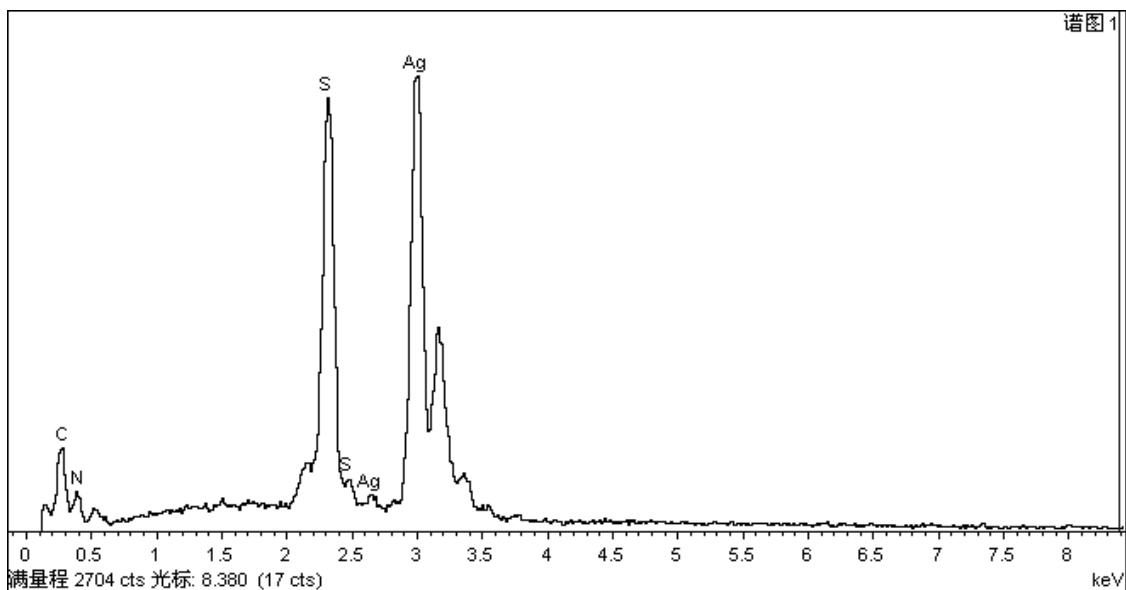

**Figure S1:** EDS spectrum of AgSCN nanoparticles.

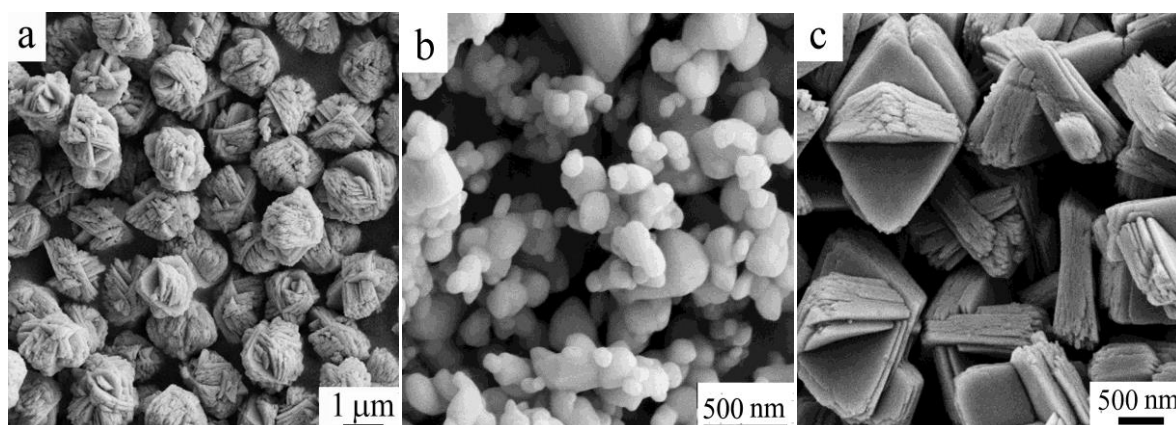

**Figure S2:** SEM images of AgSCN particles produced with the presence of PVP (a), and without the addition of PVP (b), with rapid addition of AgNO<sub>3</sub> solution instead of dropwise addition (c).

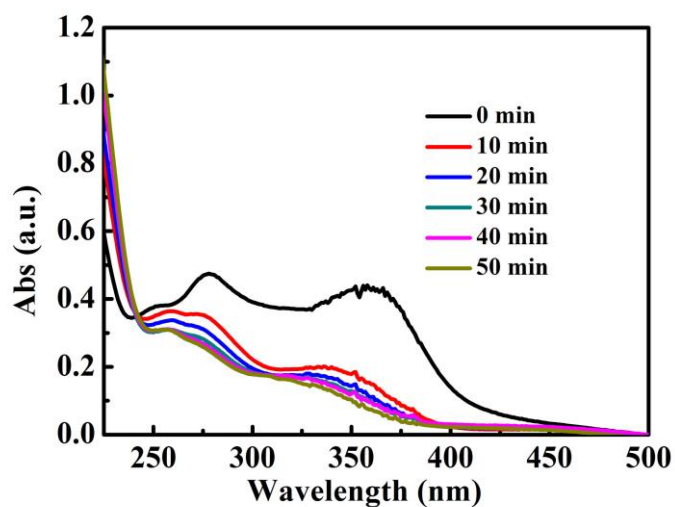

**Figure S3:** Time dependent variation of UV-vis absorption spectrum of oxytetracycline solution with  $M_2$  as catalyst.

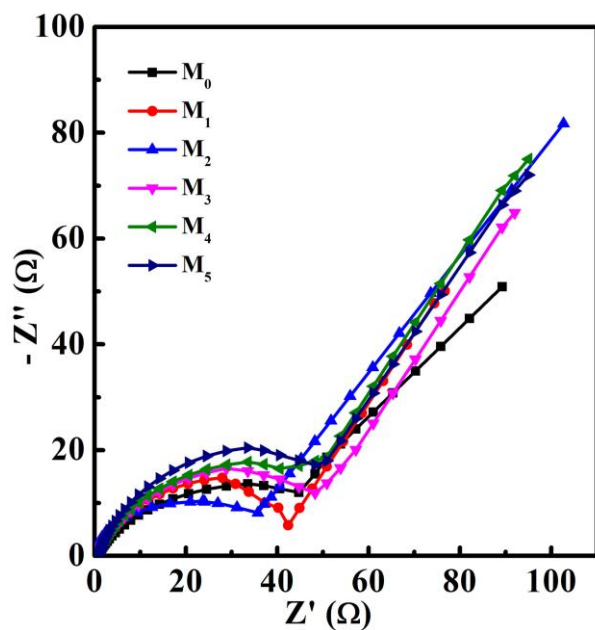

**Figure S4:** Nyquist plots of  $M_0$ ,  $M_1$ ,  $M_2$ ,  $M_3$ ,  $M_4$ ,  $M_5$  in 0.1 M NaOH solution with the frequency range of 100 kHz – 0.01 Hz.

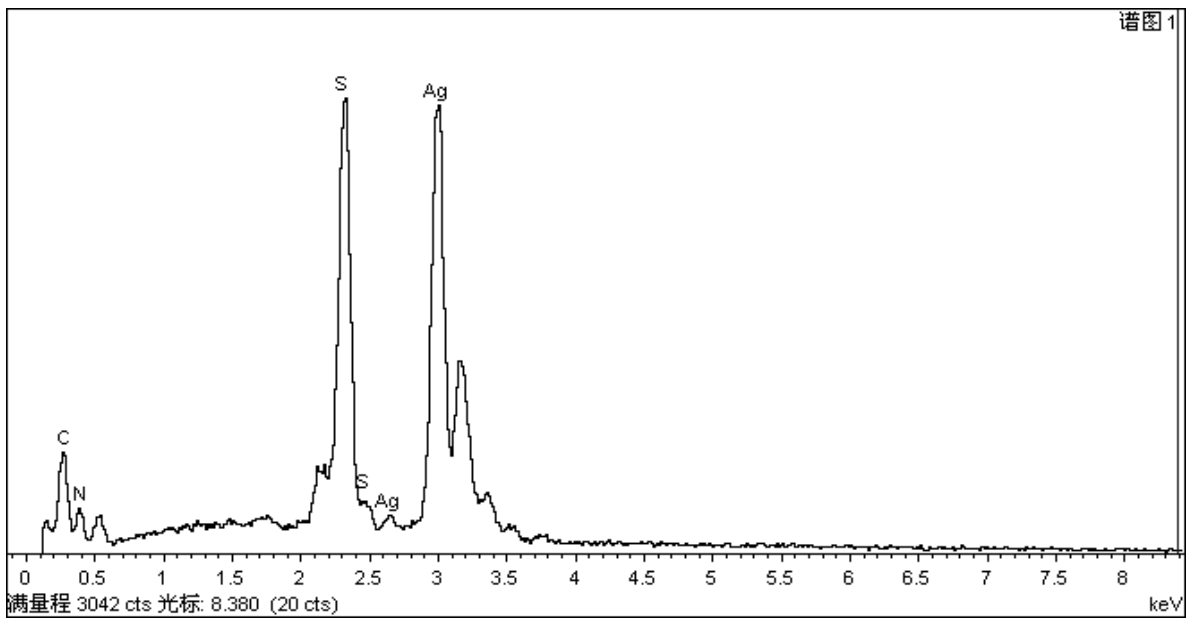

**Figure S5:** EDS spectrum of M<sub>4</sub> after five cyclic experiments.
